# Supplementary material for: Correction: Engineering of Recombinant Poplar Deoxy-D-Xylulose-5-Phosphate Synthase (PtDXS) by Site-Directed Mutagenesis Improves Its Activity
Source: PubMed Central journal article supplement (PMC5063302; doi:10.1371/journal.pone.0165028), 2016-10-13
Supplement: pone.0165028.s002.pdf [file pone.0165028.s002.pdf]

# Engineering of Recombinant Poplar Deoxy-D-xylulose-5-phosphate Synthase (*PtDXS*) by Site-directed Mutagenesis Improves Its Activity

Aparajita Banerjee<sup>1</sup>, Alyssa Preiser<sup>1</sup>, and Thomas D. Sharkey<sup>1</sup>

<sup>1</sup>Department of Biochemistry and Molecular Biology, Michigan State University, East Lansing, MI, USA

\*Corresponding author

E-mail: [[tsharkey@msu.edu](mailto:tsharkey@msu.edu)]

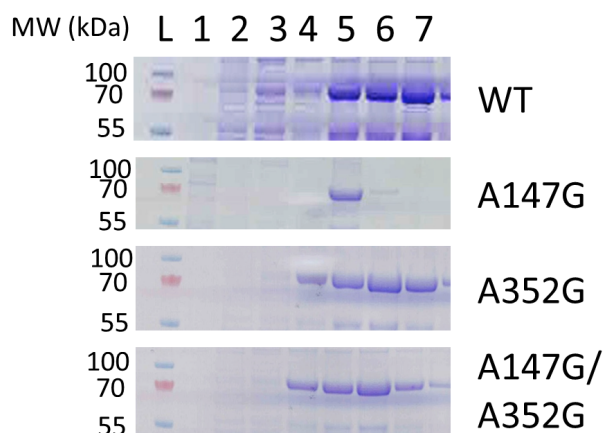

**Fig S2. SDS-PAGE of the different fractions from the Ni-NTA column purification of recombinant WT and the various mutants of *PtDXS*.** For WT panel, lane 1-3: elution fraction containing 50 mM imidazole; lane 4-5: elution fraction containing 100 mM imidazole; lane 6-7: elution fraction containing 150 mM imidazole. For A147G panel, lane 1: flow-through; lane 2- 4: wash fraction containing 10 mM imidazole; lane 5-6: elution fraction containing 250 mM imidazole, lane 7: blank. For A352G panel and A147G/A352G panel, lane 1-2: elution fraction containing 50 mM imidazole; lane 3-4: elution fraction containing 100 mM imidazole; lane 5-6: elution fraction containing 150 mM imidazole; lane 7: elution fraction containing 200 mM imidazole. L: protein marker. The molecular weight of WT and all the mutant enzymes is ~73 kDa.
