# Supplementary material for: Correction: Engineering of Recombinant Poplar Deoxy-D-Xylulose-5-Phosphate Synthase (PtDXS) by Site-Directed Mutagenesis Improves Its Activity
Source: PubMed Central journal article supplement (PMC5063302; doi:10.1371/journal.pone.0165028), 2016-10-13
Supplement: pone.0165028.s003.pdf [file pone.0165028.s003.pdf]

# Engineering of Recombinant Poplar Deoxy-D-xylulose-5-phosphate Synthase (*PtDXS*) by Site-directed Mutagenesis Improves Its Activity

Aparajita Banerjee<sup>1</sup>, Alyssa Preiser<sup>1</sup>, and Thomas D. Sharkey<sup>1</sup>

<sup>1</sup>Department of Biochemistry and Molecular Biology, Michigan State University, East Lansing, MI, USA

\*Corresponding author E-mail: [[tsharkey@msu.edu](mailto:tsharkey@msu.edu)]

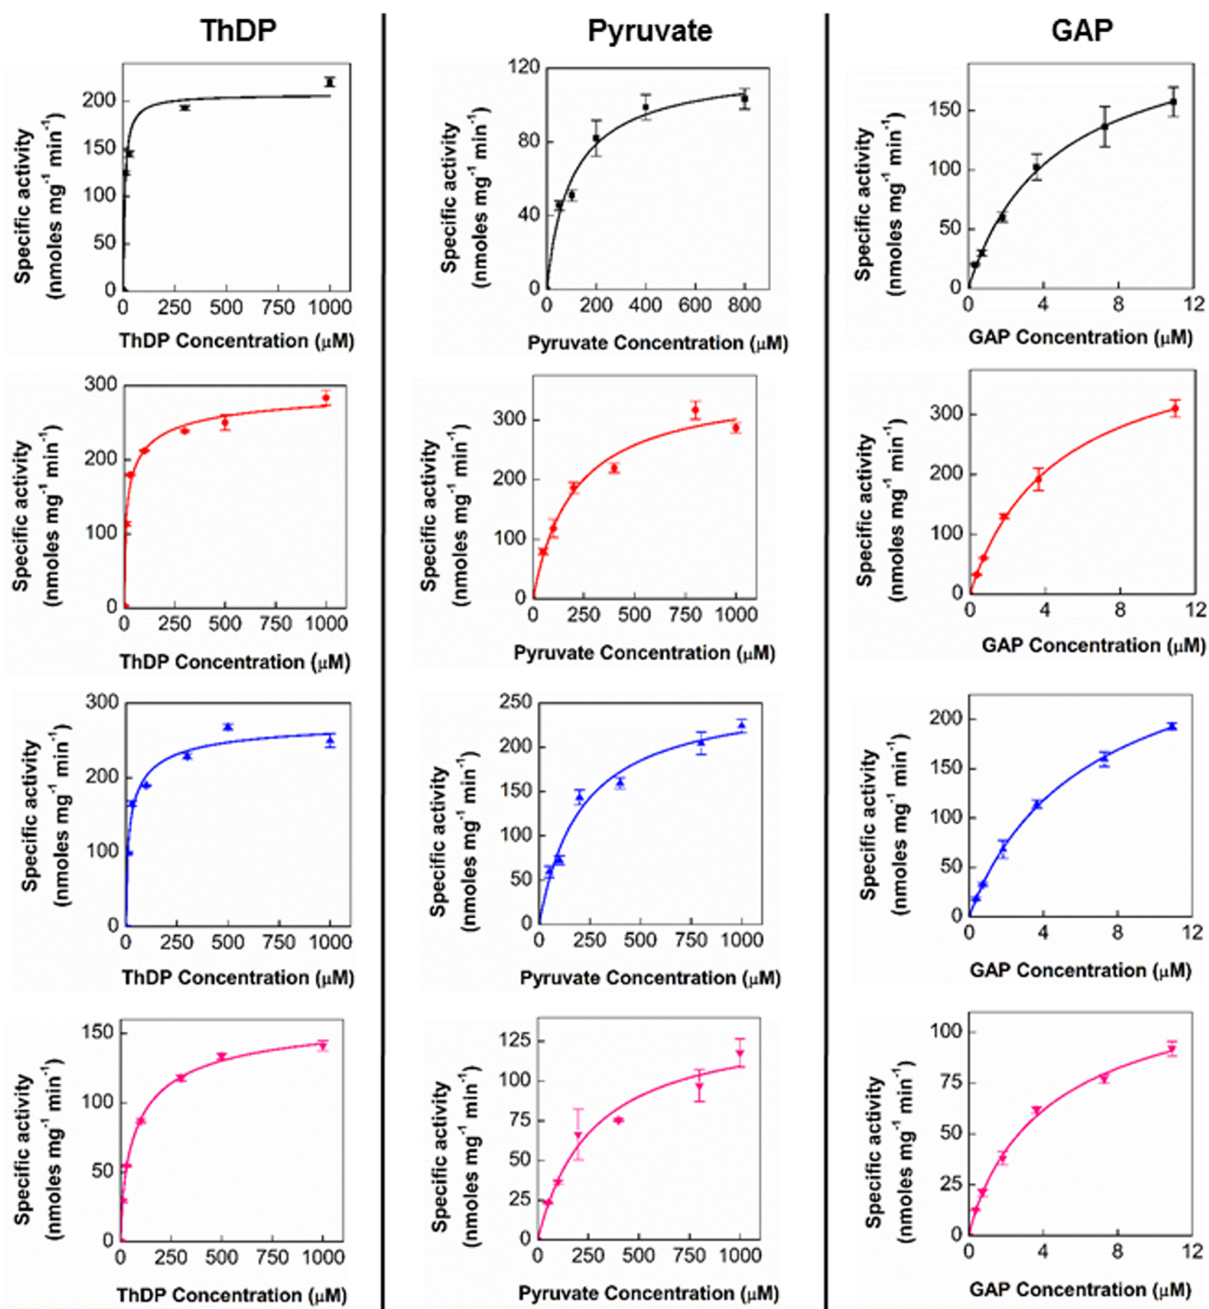

**Fig S3. Michaelis-Menten plots for WT and different mutants of *PtDXS* in presence of each of the substrates.** Each data point represents mean, error bars represent S.E. (n = 3). Different symbols represent the experimental data points. The solid lines represent the fitted curves. Black, red, blue, and pink represent the activity of WT, A147G, A352G and A147G/A352G *PtDXS* respectively.
